# Supplementary material for: The Silencing of GhPIP5K2 and GhPIP5K22 Weakens Abiotic Stress Tolerance in Upland Cotton (Gossypium hirsutum)
Source: MDPI journal article supplement (doi:10.3390/ijms25031511), 2024-01-26
Supplement: s1 [file s1]

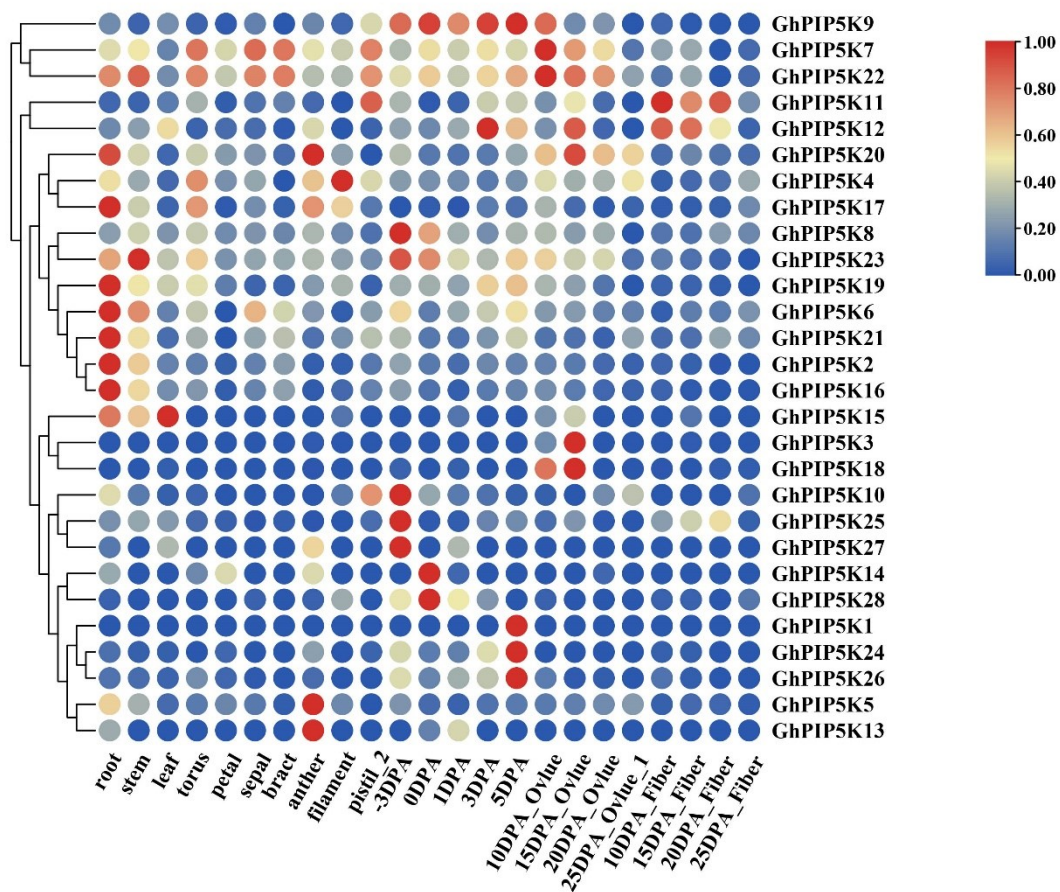

Figure S1 Transcriptome data heat maps of upland cotton *GhPIP5Ks* in different tissues.

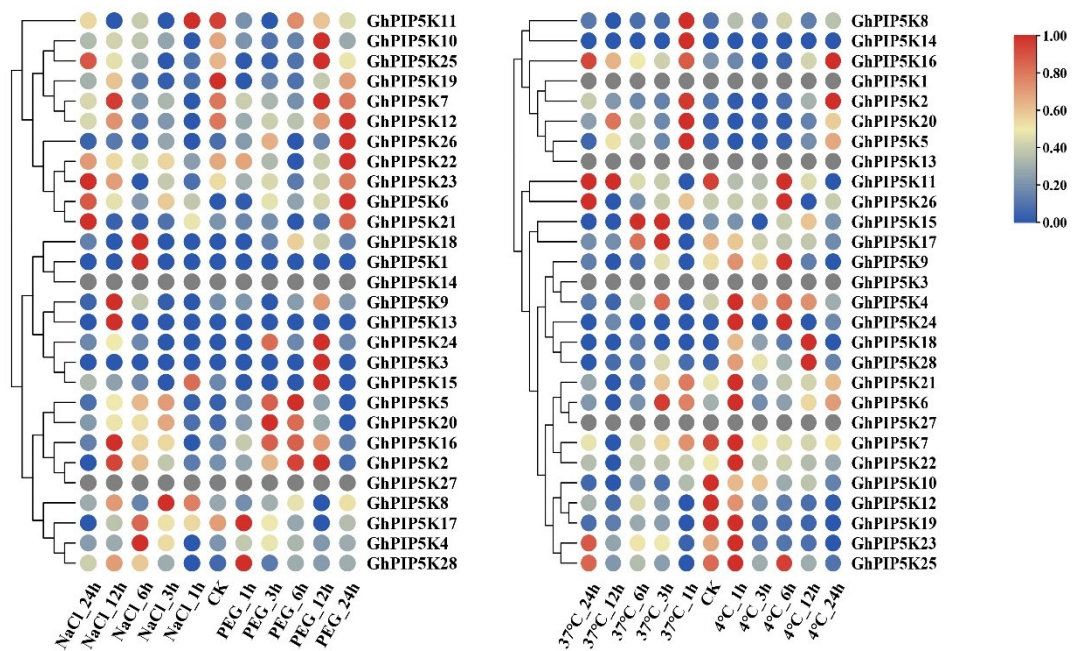

Figure S2 Transcriptome data heat map of upland cotton *GhPIP5Ks* under different abiotic stresses.
