# Supplementary material for: The Silencing of GhPIP5K2 and GhPIP5K22 Weakens Abiotic Stress Tolerance in Upland Cotton (Gossypium hirsutum)
Source: Int J Mol Sci. 2024 Jan 26;25(3):1511. doi: 10.3390/ijms25031511 (PMC10855785; doi:10.3390/ijms25031511)
Supplement: Supplementary file 1 [file ijms-25-01511-s001.zip]

Archive with 5 entries (5 files):
- MS.pdf
- Table S1.xlsx
- Table S2.xlsx
- Table S3.xlsx
- Table S4.xlsx
