# Supplementary material for: The Silencing of GhPIP5K2 and GhPIP5K22 Weakens Abiotic Stress Tolerance in Upland Cotton (Gossypium hirsutum)
Source: Int J Mol Sci. 2024 Jan 26;25(3):1511. doi: 10.3390/ijms25031511 (PMC10855785; doi:10.3390/ijms25031511)
Supplement: Supplementary file 1 [file ijms-25-01511-s001.zip › Table S1.xlsx]

## Sheet: G. raimondii
gene ID	rename
Ga02G1423	GaPIP5K1
Ga02G1631	GaPIP5K2
Ga03G2723	GaPIP5K3
Ga04G0205	GaPIP5K4
Ga04G0891	GaPIP5K5
Ga04G1963	GaPIP5K6
Ga05G2469	GaPIP5K7
Ga05G2861	GaPIP5K8
Ga05G3022	GaPIP5K9
Ga08G1513	GaPIP5K10
Ga10G0835	GaPIP5K11
Ga12G1824	GaPIP5K12
Ga13G0020	GaPIP5K13
Ga14G0112	GaPIP5K14

## Sheet: G. arboreum
gene ID	rename
Gorai.002G226500	GrPIP5K1
Gorai.002G245600	GrPIP5K2
Gorai.003G089000	GrPIP5K3
Gorai.004G153600	GrPIP5K4
Gorai.005G261500	GrPIP5K5
Gorai.008G122800	GrPIP5K6
Gorai.009G242800	GrPIP5K7
Gorai.009G283000	GrPIP5K8
Gorai.009G297500	GrPIP5K9
Gorai.009G412700	GrPIP5K10
Gorai.011G215600	GrPIP5K11
Gorai.012G018000	GrPIP5K12
Gorai.012G161300	GrPIP5K13
Gorai.013G001900	GrPIP5K14

## Sheet: A. thaliana
gene ID	rename
AT1G01460	AtPIPK10
AT1G10900	AtPIP5K7
AT1G21980	AtPIP5K1
AT1G60890	AtPIP5K8
AT1G77740	AtPIP5K2
AT2G26420	AtPIP5K3
AT2G41210	AtPIP5K5
AT3G07960	AtPIP5K6
AT3G09920	AtPIP5K9
AT3G56960	AtPIP5K4
AT4G01190	AtPIPK11

## Sheet: Z. mays
gene ID	rename
Zm00001d007082	ZmPIP5K1
Zm00001d013920	ZmPIP5K2
Zm00001d014911	ZmPIP5K3
Zm00001d022391	ZmPIP5K4
Zm00001d028512	ZmPIP5K5
Zm00001d029209	ZmPIP5K6
Zm00001d029211	ZmPIP5K7
Zm00001d032539	ZmPIP5K8
Zm00001d047457	ZmPIP5K9

## Sheet: O. sativa
gene ID	rename
Os03t0262000	OsPIP5K1
Os03t0356582	OsPIP5K2
Os03t0356596	OsPIP5K3
Os03t0701800	OsPIP5K4
Os03t0705300	OsPIP5K5
Os07t0658700	OsPIP5K6
Os08t0450800	OsPIP5K7
Os09t0402300	OsPIP5K8
Os11t0145000	OsPIP5K9
Os12t0141100	OsPIP5K10

## Sheet: T. cacao
gene ID	rename
Thecc1EG005221t1	TcPIP5K1
Thecc1EG006386t1	TcPIP5K2
Thecc1EG006386t2	TcPIP5K3
Thecc1EG022303t1	TcPIP5K4
Thecc1EG022303t2	TcPIP5K5
Thecc1EG022303t3	TcPIP5K6
Thecc1EG022303t4	TcPIP5K7
Thecc1EG022303t5	TcPIP5K8
Thecc1EG022303t6	TcPIP5K9
Thecc1EG024262t1	TcPIP5K10
Thecc1EG035031t1	TcPIP5K11
Thecc1EG045116t1	TcPIP5K12
