# Supplementary material for: The Silencing of GhPIP5K2 and GhPIP5K22 Weakens Abiotic Stress Tolerance in Upland Cotton (Gossypium hirsutum)
Source: Int J Mol Sci. 2024 Jan 26;25(3):1511. doi: 10.3390/ijms25031511 (PMC10855785; doi:10.3390/ijms25031511)
Supplement: Supplementary file 1 [file ijms-25-01511-s001.zip › Table S2.xlsx]

## Sheet: Table S2
Ka:Ks analysis of the GhPIP5K gene pairs duplication
gene 1	gene 2	Ka	Ks	Ka:Ks
GhPIP5K1	GhPIP5K15	0.00863038	0.0566891	0.152241
GhPIP5K2	GhPIP5K5	0.0499375	0.391178	0.127659
GhPIP5K2	GhPIP5K16	0.00579942	0.0322101	0.18005
GhPIP5K2	GhPIP5K20	0.0501869	0.385029	0.130345
GhPIP5K4	GhPIP5K6	0.0944044	0.540795	0.174566
GhPIP5K4	GhPIP5K17	0.0108688	0.0543048	0.200144
GhPIP5K4	GhPIP5K21	0.0935168	0.549712	0.17012
GhPIP5K5	GhPIP5K16	0.0505039	0.385311	0.131073
GhPIP5K5	GhPIP5K20	0.00846586	0.0329126	0.257222
GhPIP5K6	GhPIP5K17	0.091486	0.555633	0.164652
GhPIP5K6	GhPIP5K21	0.00484828	0.0383715	0.126351
GhPIP5K7	GhPIP5K8	0.0687703	0.536756	0.128122
GhPIP5K7	GhPIP5K22	0.0039692	0.0385415	0.102985
GhPIP5K7	GhPIP5K23	0.0735937	0.552304	0.133248
GhPIP5K8	GhPIP5K23	0.00529674	0.0582398	0.090947
GhPIP5K8	GhPIP5K22	0.0700611	0.536621	0.13056
GhPIP5K9	GhPIP5K10	0.11393	0.49136	0.231866
GhPIP5K9	GhPIP5K12	0.143128	0.504588	0.283653
GhPIP5K9	GhPIP5K19	0.135399	0.47939	0.28244
GhPIP5K9	GhPIP5K24	0.00344317	0.0413257	0.083318
GhPIP5K9	GhPIP5K26	0.146184	0.504185	0.289941
GhPIP5K10	GhPIP5K12	0.125071	0.443743	0.281854
GhPIP5K10	GhPIP5K19	0.00381753	0.0514759	0.0741616
GhPIP5K10	GhPIP5K24	0.112583	0.464185	0.242539
GhPIP5K10	GhPIP5K26	0.128218	0.441631	0.290328
GhPIP5K11	GhPIP5K13	0.18791	0.731038	0.257046
GhPIP5K11	GhPIP5K25	0.00863928	0.054486	0.15856
GhPIP5K11	GhPIP5K27	0.175836	0.643213	0.273372
GhPIP5K12	GhPIP5K19	0.145079	0.43115	0.336493
GhPIP5K12	GhPIP5K24	0.139887	0.4817	0.290403
GhPIP5K12	GhPIP5K26	0.00778101	0.032292	0.240958
GhPIP5K13	GhPIP5K25	0.188977	0.740434	0.255224
GhPIP5K13	GhPIP5K27	0.089446	0.139829	0.639681
GhPIP5K14	GhPIP5K28	0.00496143	0.0360791	0.137515
GhPIP5K16	GhPIP5K20	0.0507489	0.382166	0.132793
GhPIP5K17	GhPIP5K21	0.0902947	0.574757	0.157101
GhPIP5K19	GhPIP5K24	0.134393	0.450902	0.298054
GhPIP5K19	GhPIP5K26	0.147585	0.433555	0.340408
GhPIP5K22	GhPIP5K23	0.0745688	0.545698	0.136648
GhPIP5K24	GhPIP5K26	0.142931	0.481289	0.296975
GhPIP5K25	GhPIP5K27	0.169442	0.62825	0.269705
