# Supplementary material for: The Silencing of GhPIP5K2 and GhPIP5K22 Weakens Abiotic Stress Tolerance in Upland Cotton (Gossypium hirsutum)
Source: Int J Mol Sci. 2024 Jan 26;25(3):1511. doi: 10.3390/ijms25031511 (PMC10855785; doi:10.3390/ijms25031511)
Supplement: Supplementary file 1 [file ijms-25-01511-s001.zip › Table S3.xlsx]

## Sheet: Table S3
qRT‒PCR primers used in this study
gene ID	Primer name	Sequence (5' to 3')
GH_A01G2293	GhPIP5K2_F	GGCTTCCAGCCTCACAAGAA
	GhPIP5K2_R	ACGATCAGATACCCGGTTGC
GH_A04G1543	GhPIP5K6_F	GCTCTGTTAACACCGACCCA
	GhPIP5K6_R	GACTTCGGCTGAATCGGACT
GH_A05G2320	GhPIP5K7_F	AGTCAGGTCGGATGGAAGGA
	GhPIP5K7_R	CGTGCCCCTCTTGTAGGTTT
GH_A05G4205	GhPIP5K10_F	TTCCCATGGTCGCACAACTT
	GhPIP5K10_R	AGCAAGTCGCAATCTCGATCA
GH_D01G2192	GhPIP5K15_F	TTTAGTTGGCCCTCTGGTGC
	GhPIP5K15_R	ACGCCATTCTCCATCATAGCA
GH_D02G2535	GhPIP5K17_F	TACGTGGTCGAACGGAATGG
	GhPIP5K17_R	AGGTGATGTAAGCGTGCCAA
GH_D05G2342	GhPIP5K22_F	AGCCGAGTGACGTCGTTTTA
	GhPIP5K22_R	CCCGAACCCATGGTGAAGAA
GH_D08G1541	GhPIP5K25_F	ATGTCTGCACGTGGTGTTCA
	GhPIP5K25_R	CTTGTACGCGTGCTCGATTC
XM_016854780	GhHSFB2A_F	TCCGAGGTTATTCGGCGTTC
	GhHSFB2A_R	AATTGCGTTTCGTCTGCTGC
XM_053022573	GhHSFB2B_F	TGGAACGAAGACGGATCAGC
	GhHSFB2B_R	GTTAGCGAACTCCCACCGAT
XM_016866997	GhDREB2A_F	CAGCGTACATGGGGTAAGTGGG
	GhDREB2A_R	TTAAGGATCGCTTTGGCACCGT
XM_016874257	GhDREB2C_F	AAGGAAAACGACTCTGGCTCGG
	GhDREB2C_R	GGATCGGAACTGTGTGGCATGT
XM_016816821	GhRD20-1_F	ACCGAGACGCATTCGACCTTTT
	GhRD20-1_R	CATACCATCCTCATCCCGTGCC
XM_016869634	GhRD29A_F	AACTCCGGCAGAAACCATGGAC
	GhRD29A_R	TCTGCAATAACAGAGGTCGCCG
XM_041096285	GhBIN2_F	TCTACCCCTGTTGTTGACCG
	GhBIN2_R	TGTCCCAACTACACGCTCTG
XM_016850686	GhCBL3_F	TGCAGATCGGGTGTTTGACT
	GhCBL3_R	ACAGAAAGAGCACGAGCGAA
XM_016816921	GhNHX1_F	TTCTCTTTCTTTATGTCGGGATG
	GhNHX1_R	AACAAGACCCATCAGCACAGC
XM_041109897	GhPP2C_F	TTTGTGTCGAAATGGTGCCG
	GhPP2C_R	TTACTTTGCCACCGGCTTCT
NM_001327212	GhCBF1_F	TCGTGTTACCCCAAGAAGCG
	GhCBF1_R	TCCCGAGCCAAATCCTTGAC
NM_001327364	GhSnRK2.6_F	CACGGTTGGAACTCCTGCAT
	GhSnRK2.6_R	TAACCCCGCATGACCAAACA
KC465063	GhCIPK6_F	GCCAAAGGTCGTCTCAAGGA
	GhCIPK6_R	CAGAAATCGACGGCGGAAAC
AY305733	GhActin_F	ATCCTCCGTCTTGACCTTG
	GhActin_R	TGTCCGTCAGGCAACTCAT
