# Supplementary material for: The Silencing of GhPIP5K2 and GhPIP5K22 Weakens Abiotic Stress Tolerance in Upland Cotton (Gossypium hirsutum)
Source: Int J Mol Sci. 2024 Jan 26;25(3):1511. doi: 10.3390/ijms25031511 (PMC10855785; doi:10.3390/ijms25031511)
Supplement: Supplementary file 1 [file ijms-25-01511-s001.zip › Table S4.xlsx]

## Sheet: Table S4
Sequences of the primer pairs used in the VIGS experiment
Primer name	Sequence (5' to 3')
GhPIP5K2_F	CCGGAATTCGCCTAGGGAGTGTTGCAGAG
GhPIP5K2_R	CCGCTCGAGATTGCAAGAACCGTTGCGAG
GhPIP5K22_F	CCGGAATTCAGACGGGTGCATGTACGAAG
GhPIP5K22_R	CCGCTCGAGTATAGCAACTTCCGTCCGGC
The table highlights the presence of restriction sites through red letters. Specifically, the sequences GAATTC and CTCGAG correspond to EcoR I and Xho I restriction sites, respectively.
